# Supplementary material for: Multi-Scale Heterogeneity of Electrode Reaction for 18650-Type Lithium-Ion Batteries during Initial Charging Process
Source: MDPI journal article supplement (doi:10.3390/batteries10030109), 2024-03-18
Supplement: s1 [file s1]

## Supporting Information

### Multi-Scale Heterogeneity of Electrode Reaction for 18650-Type Lithium-ion Batteries During Initial Charging Process

Dechao Meng<sup>1</sup>, Zifeng Ma<sup>1</sup>, Linsen Li<sup>1\*</sup>

<sup>1</sup> Department of Chemical Engineering, Shanghai Electrochemical Energy Devices Research Center, Shanghai Jiao Tong University, Shanghai 200240, China

\*Corresponding author

E-mail address: linsenli@sjtu.edu.cn

#### Supplement information

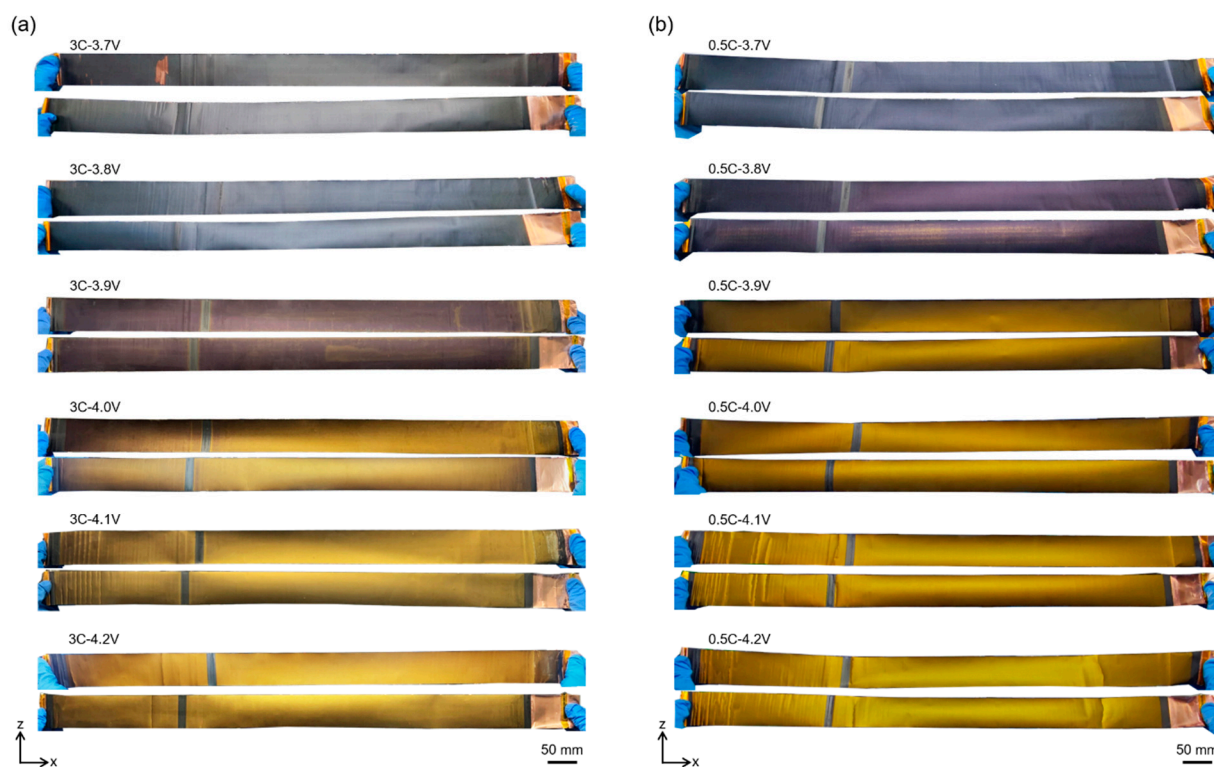

Figure S1. Quasi-operando optical images of the lithiated graphite anodes during fast-charging and slow-charging processes of 2 Ah 18650-type cells. (a) Overall expanded images of the lithiated graphite anodes between 3.7-4.2 V at four typical areas under fast-charging condition (3 C rate). (b) Overall expanded images of the lithiated graphite anodes between 3.7-4.2 V under slow-charging condition (0.5 C rate).

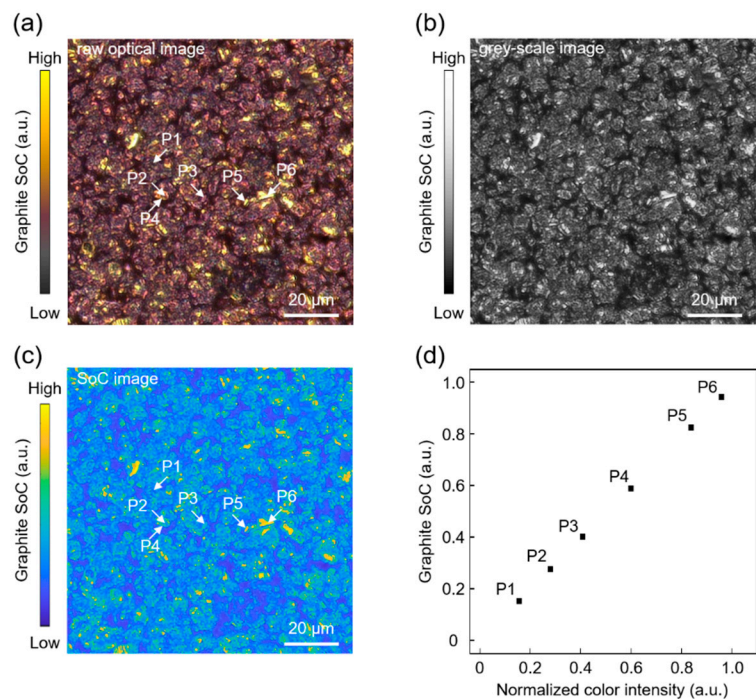

Figure S2. Calculation method of graphite SoC using Matlab. **(a)** Raw UDOF RGB image of graphite anode. **(b)** gray-scale image of panel a with a range of 0 to 255. **(c)** Normalized RGB image of panel b with a range of 0 to 1.0. **(d)** Samples of normalized and non-normalized RGB graphite SoC as labeled in panel a and panel b.
